# Supplementary material for: Direct copolycondensation of biobased elastomers based on lactic acid with tunable and versatile properties
Source: Royal Society of Chemistry journal article supplement (doi:10.1039/c5py01332a), 2015-01-01
Supplement: c5py01332a1.pdf [file c5py01332a1.pdf]

**Table S1** Thermal properties of PLBSI biobased polyester.

| Samples  | TGA                              |                                  |                          | DSC                         |               |                       |                      |                       | Crystallinity <sup>f</sup><br>(%) |
|----------|----------------------------------|----------------------------------|--------------------------|-----------------------------|---------------|-----------------------|----------------------|-----------------------|-----------------------------------|
|          | $T_{d,5\%}$ <sup>a</sup><br>(°C) | $T_{d,max}$ <sup>b</sup><br>(°C) | $RW$ <sup>c</sup><br>(%) | Second heating <sup>e</sup> |               |                       | Cooling <sup>e</sup> |                       |                                   |
|          |                                  |                                  |                          | $T_g$ <sup>d</sup><br>(°C)  | $T_m$<br>(°C) | $\Delta H_m$<br>(J/g) | $T_c$<br>(°C)        | $\Delta H_c$<br>(J/g) |                                   |
| PBSI     | 371                              | -/415                            | 5.6                      | -54                         | 61            | 82.9                  | 43                   | 79.7                  | 43.4                              |
| PLBSI-10 | 347                              | 309/413                          | 5.8                      | -51                         | 52            | 77.5                  | 32                   | 73.6                  | 25.1                              |
| PLBSI-20 | 316                              | 306/412                          | 3.0                      | -50                         | 33            | 47.2                  | 15                   | 46.8                  | 14.2                              |
| PLBSI-30 | 304                              | 304/411                          | 3.9                      | -48                         | 17            | 34.1                  | -4                   | 32.4                  | 3.9                               |
| PLBSI-40 | 290                              | 302/409                          | 4.1                      | -45                         | 7             | 19.2                  | -                    | -                     | -                                 |
| PLBSI-50 | 280                              | 301/407                          | 4.9                      | -42                         | -             | -                     | -                    | -                     | -                                 |

<sup>a</sup> Temperature at which a 5% weight loss was observed in the TGA traces recorded at 10 °C/min.

<sup>b</sup> Temperature of maximum degradation rate (containing two degradation steps)

<sup>c</sup> Remaining weight after heating at 600°C.

<sup>d</sup> Glass-transition temperature ( $T_g$ ) taken as the inflection point of the second heating DSC traces recorded at 10 °C min<sup>-1</sup>.

<sup>e</sup> Melting ( $T_m$ ) and crystallization ( $T_c$ ) temperatures and their respective enthalpies ( $\Delta H_m$  and  $\Delta H_c$ ) measured by DSC traces at heating/cooling rate of 10 °C min<sup>-1</sup>.

<sup>f</sup> Calculated by WAXD method.

### Crosslinking of PLBSI Biobased Copolyesters

In Figure S1 and Table S2, the tensile strength of PLBSI-40 increases from 0.6 MPa to 0.8 MPa while the elongation at break decreases from 1179% to 328% with increasing DCP content. The swelling ratio and crosslink density of PLBSI-40 obtained from swelling measurements were calculated to confirm that the decrease in elongation at break with increasing DCP content is due to the high crosslink density caused by the restrained mobility of polymer chains. Thus, we chose 2.5 phr as the optimum amount of DCP in PLBSI copolyesters to obtain the best mechanical properties.

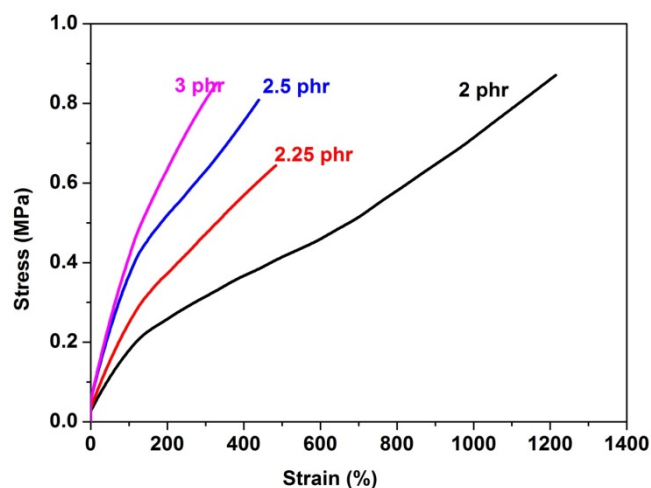

**Figure S1.** Stress-strain curves for different curing agent (DCP) contents in PLBSI biobased copolyester (PLBSI-40)

**Table S2** Mechanical properties of PLBSI-40 with different curing agent (DCP) contents

| DCP (phr) | Tensile strength (MPa) | Elongation at break (%) | Permanent set (%) |
|-----------|------------------------|-------------------------|-------------------|
| 2.0       | 0.8±0.05               | 1179±13                 | 0                 |
| 2.25      | 0.6±0.04               | 483±17                  | 0                 |
| 2.5       | 0.8±0.03               | 438±14                  | 0                 |
| 3.0       | 0.8±0.03               | 328±15                  | 0                 |

**Table S3** Crosslink density and swelling ratio of PLBSI-40 with different curing agent (DCP) contents

| DCP content (phr) | Chloroform         |                                                     |
|-------------------|--------------------|-----------------------------------------------------|
|                   | Swelling ratio (%) | Crosslink Density ( $10^{-5}$ mol/cm <sup>3</sup> ) |
| 2                 | 1991               | 4.70                                                |
| 2.25              | 1718               | 5.02                                                |
| 2.5               | 1569               | 5.79                                                |
| 3                 | 1231               | 6.68                                                |

**Table S4** Thermal properties of neat and crosslinked PLBSI biobased copolyesters

| Samples      | DSC                         |               |                       |                      |                       | Crystallinity <sup>c</sup><br>(%) |
|--------------|-----------------------------|---------------|-----------------------|----------------------|-----------------------|-----------------------------------|
|              | Second heating <sup>b</sup> |               |                       | Cooling <sup>b</sup> |                       |                                   |
|              | $T_g^a$<br>(°C)             | $T_m$<br>(°C) | $\Delta H_m$<br>(J/g) | $T_c$<br>(°C)        | $\Delta H_c$<br>(J/g) |                                   |
| PBSI         | -54                         | 61            | 82.9                  | 43                   | 79.7                  | 43.4                              |
| PBSI/DCP     | -49                         | 51            | 61.1                  | 28                   | 60.4                  | 36.5                              |
| PLBSI-20     | -50                         | 33            | 47.2                  | 15                   | 46.8                  | 14.2                              |
| PLBSI-20/DCP | -43                         | 28            | 38.5                  | 4                    | 37.1                  | 9.5                               |
| PLBSI-40     | -45                         | 7             | 19.2                  | -                    | -                     | -                                 |
| PLBSI-40/DCP | -40                         | -             | -                     | -                    | -                     | -                                 |

<sup>a</sup> Glass-transition temperature ( $T_g$ ) taken as the inflection point of a second heating DSC trace recorded at 10 °C min<sup>-1</sup>.

<sup>b</sup> Melting ( $T_m$ ) and crystallization ( $T_c$ ) temperatures and their respective enthalpies ( $\Delta H_m$  and  $\Delta H_c$ ) measured by DSC at heating/cooling rate of 10 °C min<sup>-1</sup>.

<sup>c</sup>Calculated by WAXD method.

**Table S5** Mechanical properties of crosslinked PLBSI copolyesters.

| Samples   | Tensile strength<br>(MPa) | Yield strength<br>(MPa) | Elongation at break<br>(%) | Modulus at 100% elongation<br>(MPa) | Permanent set<br>(%) |
|-----------|---------------------------|-------------------------|----------------------------|-------------------------------------|----------------------|
| PBSI      | 12.9±1.2                  | 9.4±0.7                 | 1016±13                    | 7.1±0.4                             | 300±13               |
| PLBSI -10 | 10.7±0.7                  | 5.6±0.5                 | 1226±17                    | 5.2±0.5                             | 270±3                |
| PLBSI-20  | 4.9±0.3                   | -                       | 1530±9                     | 0.8±0.2                             | 10±2                 |
| PLBSI -30 | 0.9±0.2                   | -                       | 513±15                     | 0.4±0.1                             | 0                    |
| PLBSI -40 | 0.8±0.1                   | -                       | 438±14                     | 0.4±0.03                            | 0                    |
| PLBSI -50 | 0.4±0.1                   | -                       | 459±9                      | 0.1±0.01                            | 0                    |

**Table S6** Relationship between RGR value and Cytotoxicity Grade

| Grades | 0    | 1     | 2     | 3     | 4    | 5 |
|--------|------|-------|-------|-------|------|---|
| RGR/%  | >100 | 75-99 | 50-74 | 25-49 | 1-25 | 0 |

**Table S7.** Mechanical properties of PLBSI elastomer/PLA blends with different ratios of PLBSI elastomer to PLA

| Samples       | Tensile strength (MPa) | Elongation at break (%) | Modulus at 100% elongation (MPa) | Impact strength (kJ/m <sup>2</sup> ) |
|---------------|------------------------|-------------------------|----------------------------------|--------------------------------------|
| PLA           | 57.9±1.2               | 10±1                    | -                                | 2.4±0.7                              |
| PLBSI/PLA -5  | 51.7±0.7               | 98±17                   | -                                | 6.1±0.9                              |
| PLBSI/PLA-10  | 42.9±2.3               | 154±9                   | 27.7±0.2                         | 17.7±1.3                             |
| PLBSI /PLA-15 | 40.1±1.2               | 324±15                  | 29.7±1.3                         | 35.3±0.7                             |
| PLBSI /PLA-20 | 32.8±2.1               | 253±14                  | 24.5±1.7                         | 7.8±1.1                              |
